# Supplementary material for: Chronic kidney disease and undiagnosed atrial fibrillation in individuals with diabetes
Source: Springer Nature journal article supplement (doi:10.1186/s12933-020-01128-y), 2020-09-30

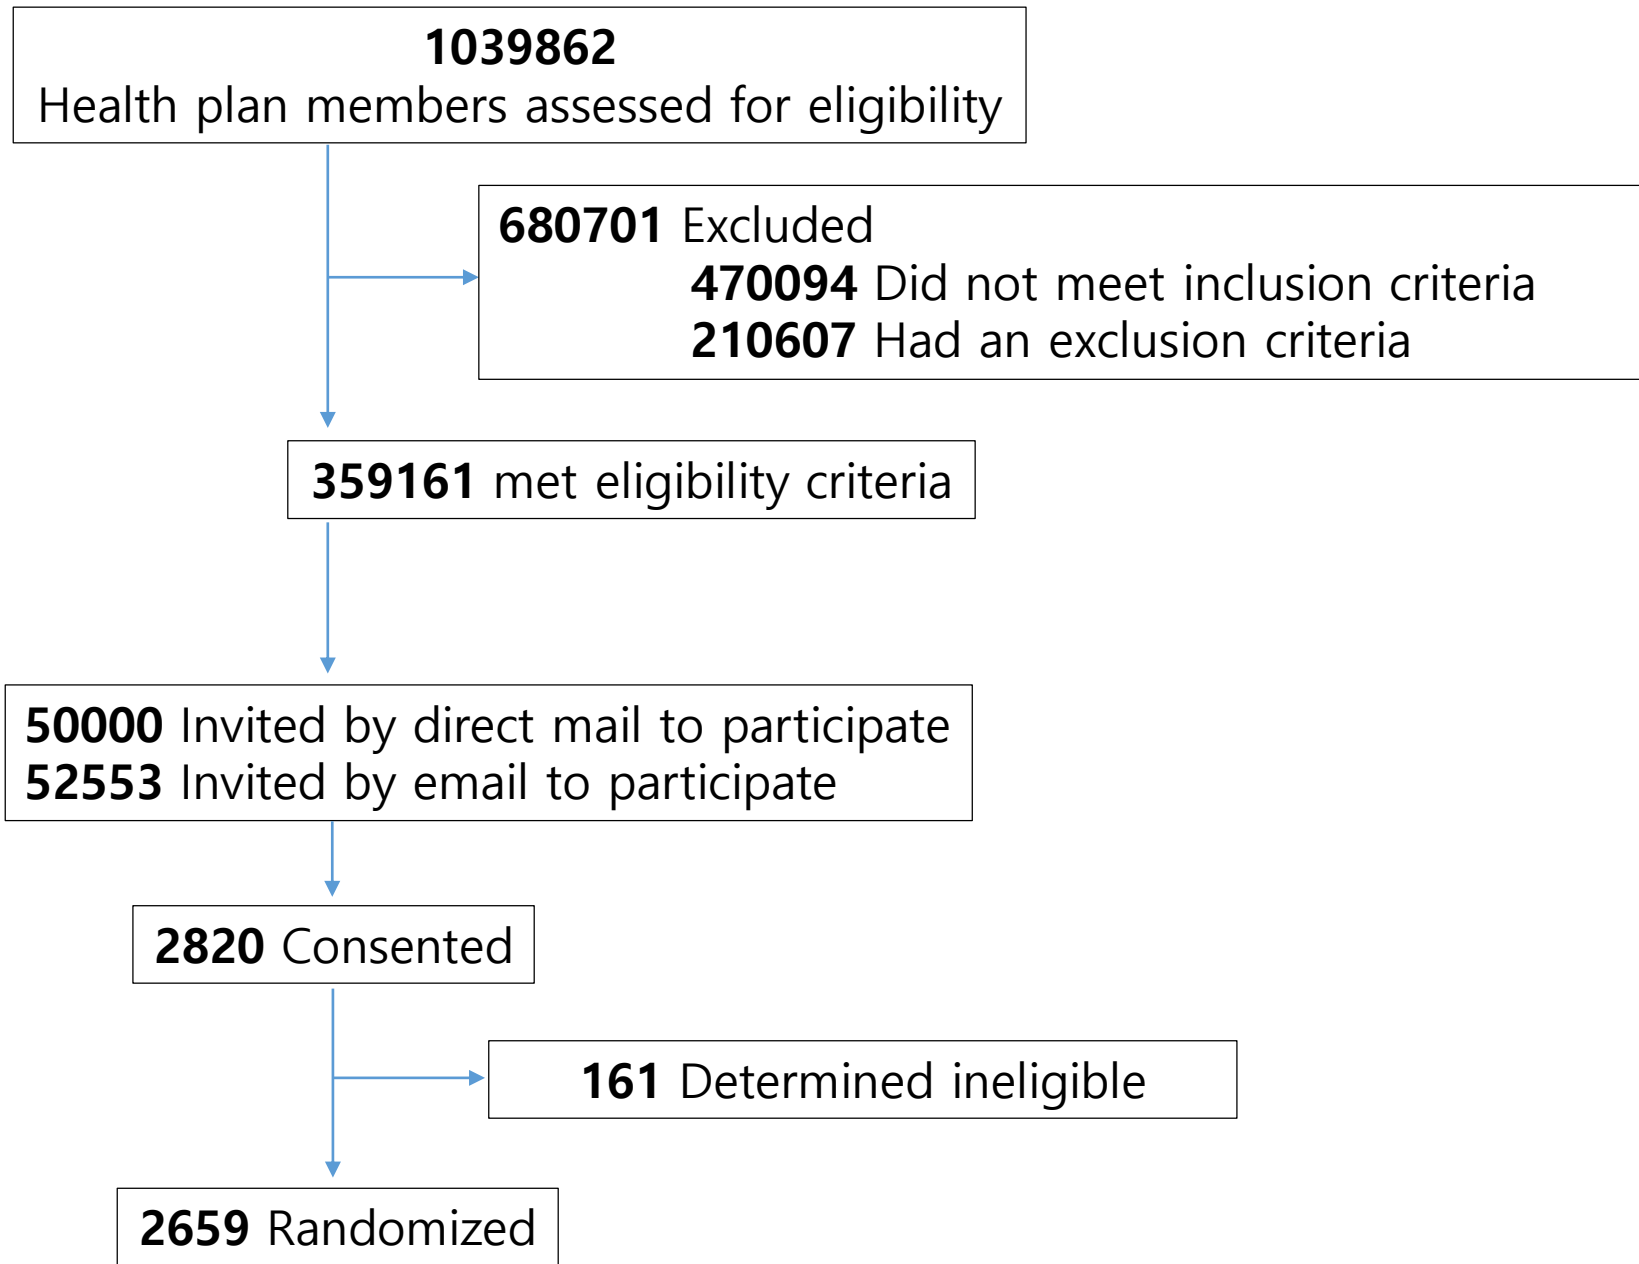

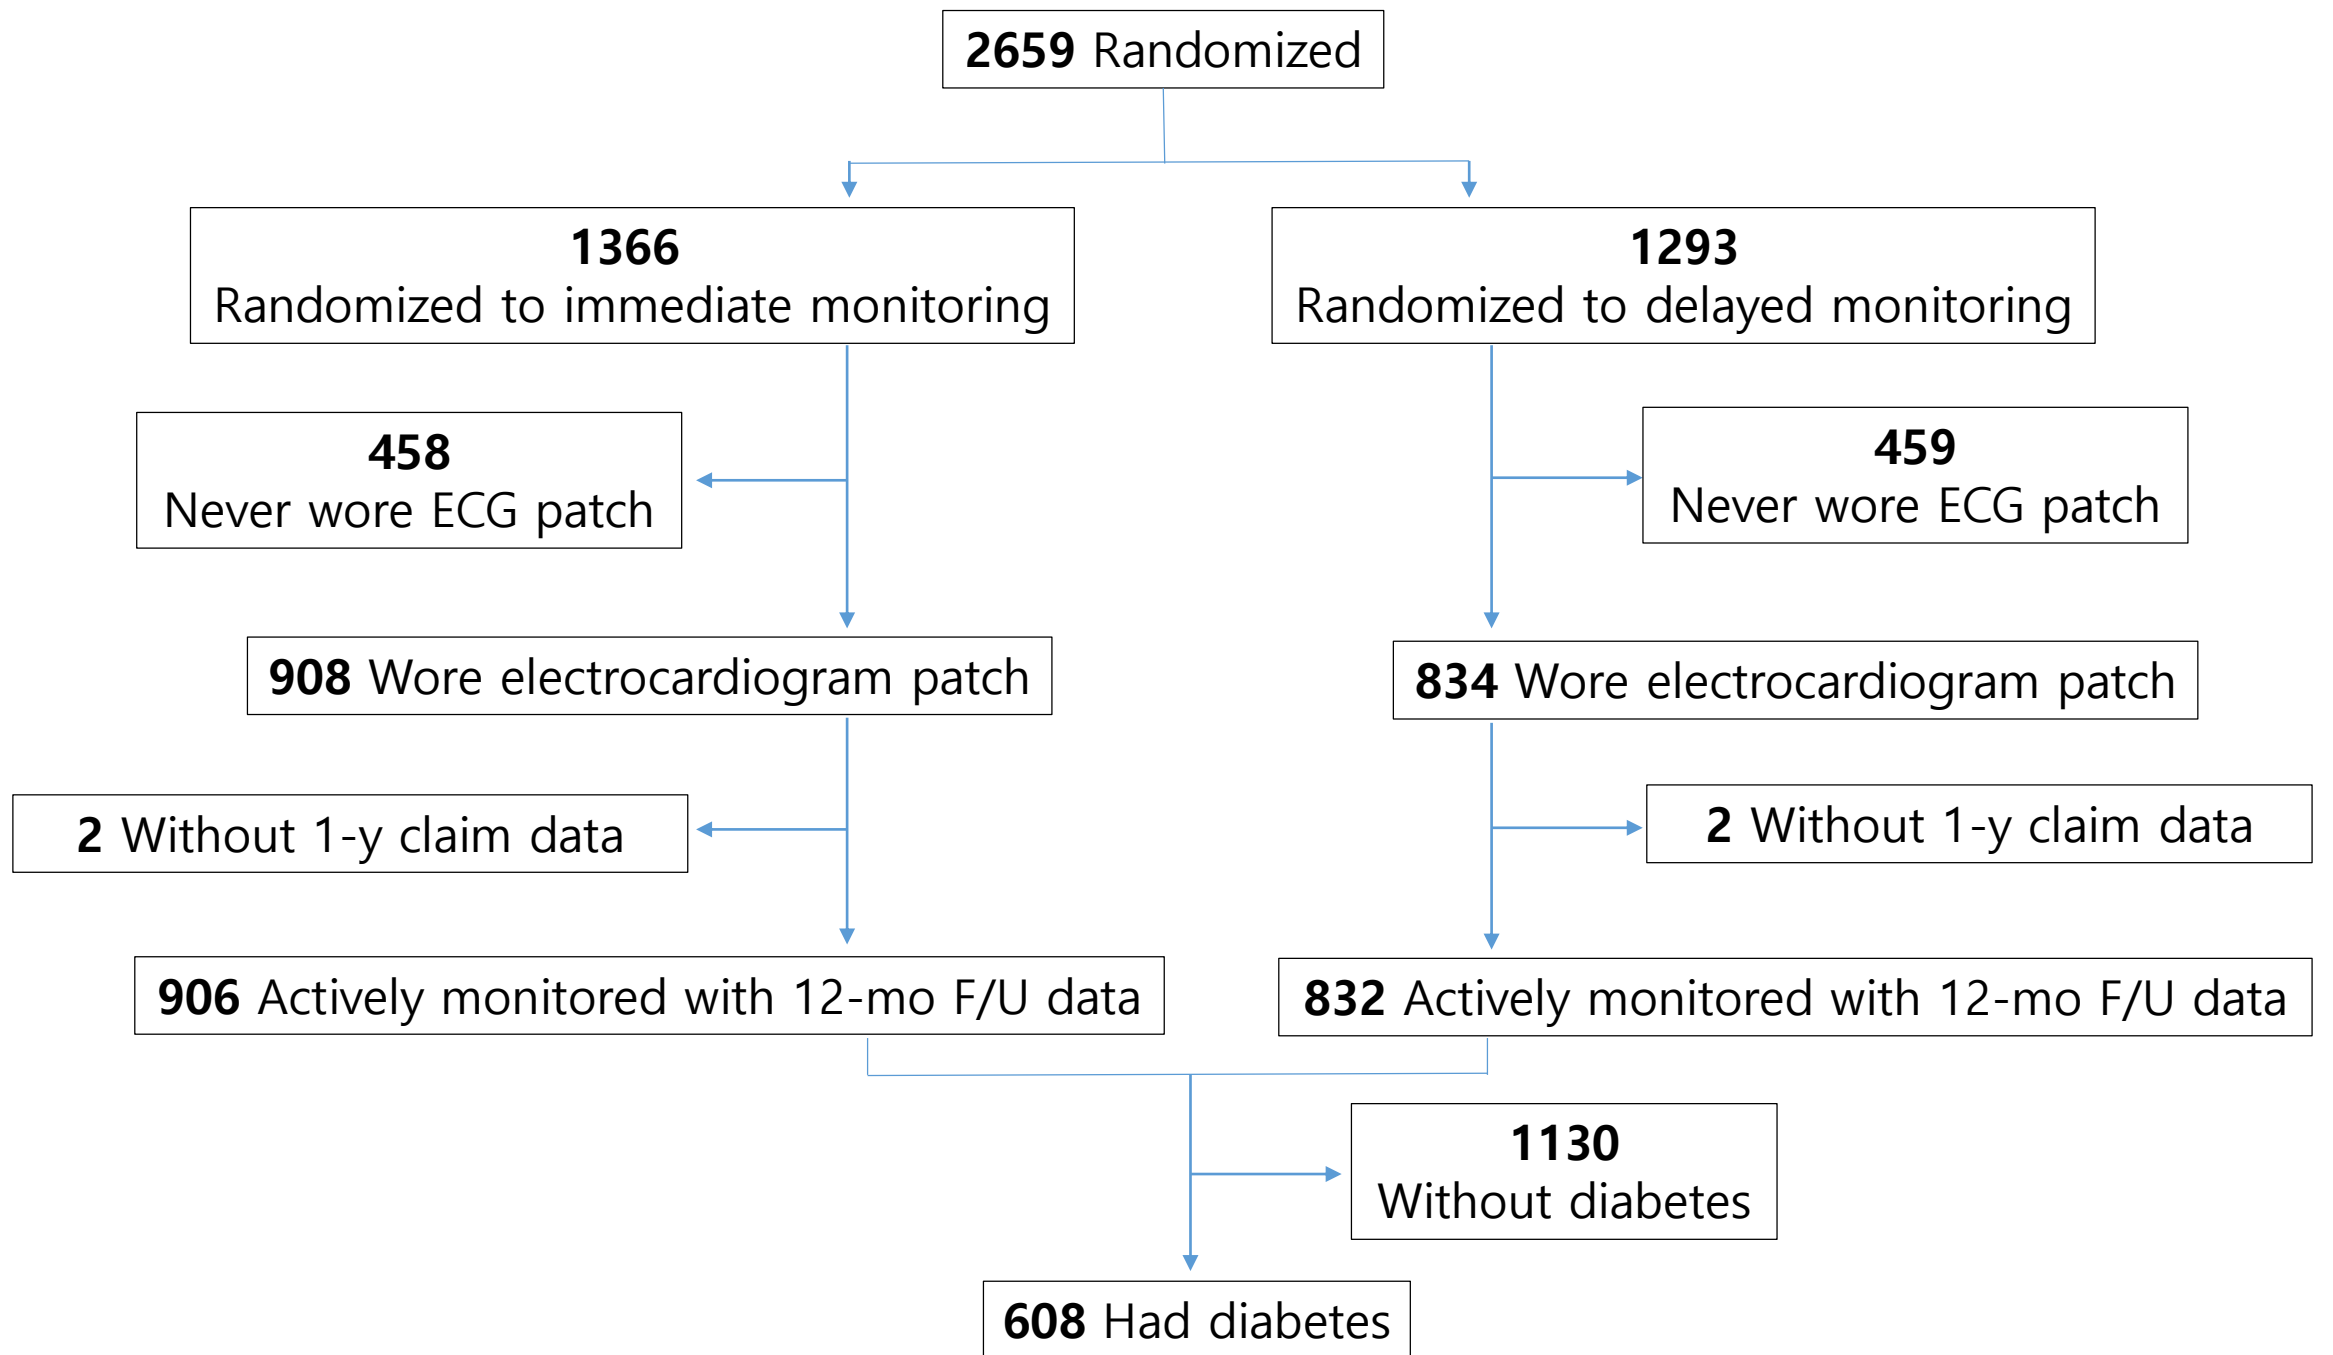

Supplement: MOESM1 [file 18433898]
